# Supplementary material for: The Shapes of Sulfonamides: A Rotational Spectroscopy Study
Source: MDPI journal article supplement (doi:10.3390/molecules27092820), 2022-04-28
Supplement: s1 [file s1]

# The Shapes of Sulfonamides: A Rotational Spectroscopy Study

Annalisa Vigorito <sup>1</sup>, Camilla Calabrese <sup>1,2</sup>, Assimo Maris <sup>1</sup>, Donatella Loru <sup>3,4</sup>, Isabel Peña <sup>2,3</sup>, M. Eugenia Sanz <sup>3</sup> and Sonia Melandri <sup>1,\*</sup>

<sup>1</sup> Dipartimento di Chimica "G. Ciamician" dell'Università, via Selmi 2, I-40126 Bologna, Italy; vigo-giff@gmail.com (A.V.); calabrese.cami@gmail.com (C.C.); assimo.maris@unibo.it (A.M.)

<sup>2</sup> Current address: Departamento de Química Física y Química Inorgánica, Facultad de Ciencias—I.U.CINQUIMA, Universidad de Valladolid, E-47011 Valladolid, Spain; mipencal@uva.es

<sup>3</sup> Department of Chemistry, King's College London, Britannia House, 7 Trinity Street, London SE1 1DB, UK; donatella.loru@desy.de (D.L.); maria.sanz@kcl.ac.uk (M.E.S.)

<sup>4</sup> Current address: Deutsches Elektronen-Synchrotron DESY, Notkestraße 85, 22607 Hamburg, Germany

\* Correspondence: sonia.melandri@unibo.it

## CONTENTS

|            |                                                              |
|------------|--------------------------------------------------------------|
| Table S1.  | Measured transition frequencies for BSA (MHz).               |
| Table S2.  | Measured transition frequencies for PTS (MHz).               |
| Table S3.  | Measured transition frequencies for OTS (MHz).               |
| Table S4.  | Measured transition frequencies for SUA (MHz).               |
| Figure S1. | ∠CCSN torsion angle values found in PDB for BSA, SUA and OTS |

**Table S1.** Measured transition frequencies for BSA (MHz).

| BSA-NH <sub>2</sub> |         |         |       |      |        |        |      |          |             |
|---------------------|---------|---------|-------|------|--------|--------|------|----------|-------------|
| $J''$               | $K_a''$ | $K_c''$ | $F''$ | $J'$ | $K_a'$ | $K_c'$ | $F'$ | $\nu$    | $\Delta\nu$ |
| 2                   | 0       | 2       | 2     | 1    | 0      | 1      | 2    | 3132.022 | -0.006      |
| 2                   | 0       | 2       | 1     | 1    | 0      | 1      | 0    | 3132.175 | 0.019       |
| 2                   | 0       | 2       | 3     | 1    | 0      | 1      | 2    | 3132.857 | -0.012      |
| 2                   | 1       | 2       | 2     | 1    | 1      | 1      | 1    | 3029.083 | -0.008      |
| 2                   | 1       | 2       | 3     | 1    | 1      | 1      | 2    | 3029.907 | 0.004       |
| 2                   | 1       | 2       | 1     | 1    | 1      | 1      | 0    | 3030.741 | -0.004      |
| 2                   | 1       | 1       | 2     | 1    | 1      | 0      | 1    | 3244.665 | -0.009      |
| 2                   | 1       | 1       | 3     | 1    | 1      | 0      | 2    | 3245.486 | -0.005      |
| 2                   | 1       | 1       | 1     | 1    | 1      | 0      | 0    | 3246.292 | -0.004      |
| 3                   | 0       | 3       | 4     | 2    | 0      | 2      | 3    | 4687.497 | 0.001       |
| 3                   | 1       | 3       | 3     | 2    | 1      | 2      | 2    | 4541.559 | -0.003      |
| 3                   | 1       | 3       | 4     | 2    | 1      | 2      | 3    | 4541.791 | -0.003      |
| 3                   | 1       | 2       | 3     | 2    | 1      | 1      | 2    | 4864.814 | 0.007       |
| 3                   | 1       | 2       | 4     | 2    | 1      | 1      | 3    | 4865.039 | -0.003      |
| 3                   | 2       | 2       | 3     | 2    | 2      | 1      | 2    | 4705.642 | -0.004      |
| 3                   | 2       | 2       | 4     | 2    | 2      | 1      | 3    | 4706.487 | -0.001      |
| 3                   | 2       | 2       | 2     | 2    | 2      | 1      | 1    | 4706.957 | 0.001       |
| 3                   | 2       | 1       | 4     | 2    | 2      | 0      | 3    | 4725.323 | -0.007      |
| 4                   | 0       | 4       | 5     | 3    | 0      | 3      | 4    | 6228.352 | -0.026      |
| 4                   | 1       | 4       | 4     | 3    | 1      | 3      | 3    | 6050.352 | 0.006       |
| 4                   | 1       | 4       | 5     | 3    | 1      | 3      | 4    | 6050.463 | 0.014       |
| 4                   | 1       | 3       | 4     | 3    | 1      | 2      | 3    | 6480.743 | 0.007       |
| 4                   | 1       | 3       | 5     | 3    | 1      | 2      | 4    | 6480.856 | 0.016       |
| 4                   | 2       | 3       | 4     | 3    | 2      | 2      | 3    | 6271.121 | -0.002      |
| 4                   | 2       | 3       | 5     | 3    | 2      | 2      | 4    | 6271.486 | 0.006       |
| 4                   | 2       | 2       | 4     | 3    | 2      | 1      | 3    | 6317.832 | 0.001       |
| 4                   | 2       | 2       | 5     | 3    | 2      | 1      | 4    | 6318.195 | 0.003       |
| 5                   | 0       | 5       | 6     | 4    | 0      | 4      | 5    | 7751.981 | 0.006       |
| 5                   | 1       | 5       | 6     | 4    | 1      | 4      | 5    | 7555.031 | 0.014       |
| 5                   | 2       | 4       | 5     | 4    | 2      | 3      | 4    | 7833.185 | -0.004      |
| 5                   | 2       | 4       | 6     | 4    | 2      | 3      | 5    | 7833.379 | 0.004       |
| 5                   | 2       | 3       | 5     | 4    | 2      | 2      | 4    | 7925.034 | -0.002      |
| 5                   | 2       | 3       | 6     | 4    | 2      | 2      | 5    | 7925.248 | 0.020       |

  

| BSA-NH <sub>2</sub> |         |         |       |      |        |        |      |          |             | BSA-NHD  |             | BSA-ND <sub>2</sub> |             |
|---------------------|---------|---------|-------|------|--------|--------|------|----------|-------------|----------|-------------|---------------------|-------------|
| $J''$               | $K_a''$ | $K_c''$ | $F''$ | $J'$ | $K_a'$ | $K_c'$ | $F'$ | $\nu$    | $\Delta\nu$ | $\nu$    | $\Delta\nu$ | $\nu$               | $\Delta\nu$ |
| 12                  | 12      | 1       |       | 11   | 11     | 1      |      | 61220.38 | 0.031       | 60055.53 | 0.02        |                     |             |
| 12                  | 12      | 0       |       | 11   | 11     | 0      |      | 61220.38 | 0.031       | 60055.53 | 0.02        |                     |             |
| 13                  | 12      | 2       |       | 12   | 11     | 2      |      |          |             | 61607.61 | 0.03        | 60520.07            | 0.07        |
| 13                  | 12      | 1       |       | 12   | 11     | 1      |      |          |             | 61607.61 | 0.03        | 60520.07            | 0.07        |
| 13                  | 13      | 0       |       | 12   | 12     | 0      |      | 66475.37 | -0.037      | 65209.97 | -0.08       |                     |             |
| 14                  | 11      | 4       |       | 13   | 10     | 4      |      | 60675.40 | -0.021      | 65209.97 | -0.08       |                     |             |
| 14                  | 11      | 3       |       | 13   | 10     | 3      |      | 60675.40 | -0.021      | 65209.97 | -0.08       |                     |             |
| 14                  | 12      | 3       |       | 13   | 11     | 3      |      | 64360.46 | -0.115      | 63159.47 | -0.09       | 62054.10            | 0.06        |
| 14                  | 12      | 2       |       | 13   | 11     | 2      |      | 64360.46 | -0.115      | 63159.47 | -0.09       | 62054.10            | 0.06        |
| 14                  | 14      | 1       |       | 13   | 13     | 1      |      | 71730.50 | 0.079       | 70364.62 | 0.07        | 69110.53            | 0.02        |
| 14                  | 14      | 0       |       | 13   | 13     | 0      |      | 71730.50 | 0.079       | 70364.62 | 0.07        | 69110.53            | 0.02        |
| 15                  | 11      | 5       |       | 14   | 10     | 5      |      | 62245.05 | -0.060      | 61108.45 | -0.03       | 60059.30            | 0.00        |
| 15                  | 11      | 4       |       | 14   | 10     | 4      |      | 62245.05 | -0.060      | 61108.45 | -0.03       | 60059.30            | 0.00        |
| 15                  | 12      | 4       |       | 14   | 11     | 4      |      | 65930.57 | 0.057       | 64711.50 | 0.08        | 63587.91            | -0.04       |

|    |    |    |    |    |    |          |        |          |       |          |       |
|----|----|----|----|----|----|----------|--------|----------|-------|----------|-------|
| 15 | 12 | 3  | 14 | 11 | 3  | 65930.57 | 0.057  | 64711.50 | 0.08  | 63587.91 | -0.04 |
| 15 | 13 | 3  | 14 | 12 | 3  | 69615.55 | -0.047 |          |       |          |       |
| 15 | 13 | 2  | 14 | 12 | 2  | 69615.55 | -0.047 |          |       |          |       |
| 15 | 14 | 2  | 14 | 13 | 2  | 73300.54 | 0.013  | 66762.04 | -0.05 | 65582.22 | -0.09 |
| 15 | 14 | 1  | 14 | 13 | 1  | 73300.54 | 0.013  | 66762.04 | -0.05 | 65582.22 | -0.09 |
| 16 | 10 | 7  | 15 | 9  | 7  | 60127.85 | 0.072  |          |       |          |       |
| 16 | 10 | 6  | 15 | 9  | 6  | 60127.85 | 0.072  |          |       |          |       |
| 16 | 11 | 6  | 15 | 10 | 6  | 63814.48 | -0.011 | 62659.92 | 0.10  | 61592.72 | -0.02 |
| 16 | 11 | 5  | 15 | 10 | 5  | 63814.48 | -0.011 | 62659.92 | 0.10  | 61592.72 | -0.02 |
| 16 | 12 | 5  | 15 | 11 | 5  | 67500.17 | -0.089 | 66263.10 | 0.01  | 65121.71 | 0.02  |
| 16 | 12 | 4  | 15 | 11 | 4  | 67500.17 | -0.089 | 66263.10 | 0.01  | 65121.71 | 0.02  |
| 16 | 13 | 4  | 15 | 12 | 4  | 71185.46 | -0.079 |          |       |          |       |
| 16 | 13 | 3  | 15 | 12 | 3  | 71185.46 | -0.079 |          |       |          |       |
| 16 | 14 | 3  | 15 | 13 | 3  |          |        |          |       | 72178.60 | 0.05  |
| 16 | 14 | 2  | 15 | 13 | 2  |          |        |          |       | 72178.60 | 0.05  |
| 17 | 10 | 8  | 16 | 9  | 8  | 61695.76 | -0.108 | 60605.77 | -0.04 |          |       |
| 17 | 10 | 7  | 16 | 9  | 7  | 61695.76 | -0.108 | 60605.77 | -0.04 |          |       |
| 17 | 11 | 7  | 16 | 10 | 7  |          |        |          |       | 63125.82 | -0.01 |
| 17 | 11 | 6  | 16 | 10 | 6  |          |        |          |       | 63125.82 | -0.01 |
| 17 | 12 | 6  | 16 | 11 | 6  | 69069.75 | -0.002 | 67814.43 | -0.10 | 66655.28 | 0.06  |
| 17 | 12 | 5  | 16 | 11 | 5  | 69069.75 | -0.002 | 67814.43 | -0.10 | 66655.28 | 0.06  |
| 17 | 13 | 5  | 16 | 12 | 5  | 72755.21 | -0.109 |          |       |          |       |
| 17 | 13 | 4  | 16 | 12 | 4  | 72755.21 | -0.109 |          |       |          |       |
| 17 | 17 | 0  | 17 | 16 | 2  | 60799.22 | 0.022  |          |       |          |       |
| 17 | 17 | 1  | 17 | 16 | 1  | 60799.22 | 0.022  |          |       |          |       |
| 18 | 5  | 13 | 17 | 2  | 15 | 62150.12 | -0.043 |          |       |          |       |
| 18 | 10 | 9  | 17 | 9  | 9  | 63263.22 | 0.021  | 62155.19 | -0.05 | 61126.89 | -0.08 |
| 18 | 10 | 8  | 17 | 9  | 8  | 63263.22 | 0.021  | 62155.19 | -0.05 | 61126.89 | -0.08 |
| 18 | 11 | 8  | 17 | 10 | 8  | 66951.94 | -0.029 | 65761.33 | 0.04  | 64658.38 | -0.12 |
| 18 | 11 | 7  | 17 | 10 | 7  | 66951.94 | -0.029 | 65761.33 | 0.04  | 64658.38 | -0.12 |
| 18 | 12 | 7  | 17 | 11 | 7  | 70638.96 | 0.039  | 69365.59 | -0.07 |          |       |
| 18 | 12 | 6  | 17 | 11 | 6  | 70638.96 | 0.039  | 69365.59 | -0.07 |          |       |
| 18 | 13 | 6  | 17 | 12 | 6  | 74324.82 | -0.064 |          |       |          |       |
| 18 | 13 | 5  | 17 | 12 | 5  | 74324.82 | -0.064 |          |       |          |       |
| 18 | 17 | 1  | 18 | 16 | 3  | 60797.15 | 0.134  |          |       |          |       |
| 18 | 17 | 2  | 18 | 16 | 2  | 60797.15 | 0.134  |          |       |          |       |
| 18 | 18 | 1  | 18 | 17 | 1  | 64483.95 | -0.046 |          |       |          |       |
| 18 | 18 | 0  | 18 | 17 | 2  | 64483.95 | -0.046 |          |       |          |       |
| 19 | 5  | 14 | 18 | 2  | 16 | 63408.29 | 0.043  |          |       |          |       |
| 19 | 9  | 11 | 18 | 8  | 11 | 61134.71 | -0.101 |          |       |          |       |
| 19 | 9  | 10 | 18 | 8  | 10 | 61134.71 | -0.100 |          |       |          |       |
| 19 | 10 | 10 | 18 | 9  | 10 | 64829.60 | -0.020 | 63703.83 | 0.00  | 62657.91 | 0.05  |
| 19 | 10 | 9  | 18 | 9  | 9  | 64829.60 | -0.020 | 63703.83 | 0.00  | 62657.91 | 0.05  |
| 19 | 11 | 9  | 18 | 10 | 9  | 68519.95 | 0.085  | 67311.30 | 0.06  | 66190.62 | -0.03 |
| 19 | 11 | 8  | 18 | 10 | 8  | 68519.95 | 0.085  | 67311.30 | 0.06  | 66190.62 | -0.03 |
| 19 | 12 | 8  | 18 | 11 | 8  | 72207.75 | 0.060  | 70916.42 | 0.01  |          |       |
| 19 | 12 | 7  | 18 | 11 | 7  | 72207.75 | 0.060  | 70916.42 | 0.01  |          |       |
| 19 | 17 | 2  | 19 | 16 | 4  | 60794.60 | 0.137  |          |       |          |       |
| 19 | 17 | 3  | 19 | 16 | 3  | 60794.60 | 0.137  |          |       |          |       |
| 19 | 18 | 1  | 19 | 17 | 3  | 64481.88 | 0.049  |          |       |          |       |
| 19 | 18 | 2  | 19 | 17 | 2  | 64481.88 | 0.049  |          |       |          |       |
| 20 | 4  | 16 | 19 | 1  | 18 | 61263.96 | -0.016 |          |       |          |       |
| 20 | 5  | 15 | 19 | 2  | 17 | 64798.63 | -0.036 |          |       |          |       |

|    |    |    |    |    |    |          |        |          |       |          |       |
|----|----|----|----|----|----|----------|--------|----------|-------|----------|-------|
| 20 | 9  | 12 | 19 | 8  | 12 | 62696.91 | -0.088 | 61636.89 | 0.02  | 60648.50 | 0.06  |
| 20 | 9  | 11 | 19 | 8  | 11 | 62696.91 | -0.083 | 61636.89 | 0.03  | 60648.50 | 0.07  |
| 20 | 10 | 11 | 19 | 9  | 11 | 66395.04 | 0.071  |          |       | 64187.75 | -0.08 |
| 20 | 10 | 10 | 19 | 9  | 10 | 66395.04 | 0.072  |          |       | 64187.75 | -0.08 |
| 20 | 11 | 10 | 19 | 10 | 10 | 70087.02 | -0.029 | 68860.60 | 0.08  | 67722.17 | -0.02 |
| 20 | 11 | 9  | 19 | 10 | 9  | 70087.02 | -0.029 | 68860.60 | 0.08  | 67722.17 | -0.02 |
| 20 | 12 | 9  | 19 | 11 | 9  | 73776.04 | 0.064  | 72466.68 | -0.03 |          |       |
| 20 | 12 | 8  | 19 | 11 | 8  | 73776.04 | 0.064  | 72466.68 | -0.03 |          |       |
| 20 | 17 | 3  | 20 | 16 | 5  | 60791.60 | 0.100  |          |       |          |       |
| 20 | 17 | 4  | 20 | 16 | 4  | 60791.60 | 0.100  |          |       |          |       |
| 20 | 18 | 2  | 20 | 17 | 4  | 64479.29 | -0.032 |          |       |          |       |
| 20 | 18 | 3  | 20 | 17 | 3  | 64479.29 | -0.032 |          |       |          |       |
| 21 | 4  | 17 | 20 | 1  | 19 | 64389.24 | 0.030  |          |       |          |       |
| 21 | 5  | 16 | 20 | 2  | 18 | 66353.84 | 0.040  |          |       |          |       |
| 21 | 8  | 14 | 20 | 7  | 14 | 60540.53 | -0.266 |          |       |          |       |
| 21 | 8  | 13 | 20 | 7  | 13 | 60540.53 | 0.129  |          |       |          |       |
| 21 | 9  | 13 | 20 | 8  | 13 | 64257.28 | 0.025  | 63179.65 | -0.09 | 62174.13 | 0.08  |
| 21 | 9  | 12 | 20 | 8  | 12 | 64257.28 | 0.036  | 63179.65 | -0.09 | 62174.13 | 0.09  |
| 21 | 11 | 11 | 20 | 10 | 11 | 71653.27 | -0.129 | 70408.92 | -0.10 | 69253.07 | 0.05  |
| 21 | 11 | 10 | 20 | 10 | 10 | 71653.27 | -0.129 | 70408.92 | -0.10 | 69253.07 | 0.05  |
| 21 | 17 | 4  | 21 | 16 | 6  | 60788.11 | 0.026  |          |       |          |       |
| 21 | 17 | 5  | 21 | 16 | 5  | 60788.11 | 0.026  |          |       |          |       |
| 21 | 18 | 3  | 21 | 17 | 5  | 64476.36 | -0.071 |          |       |          |       |
| 21 | 18 | 4  | 21 | 17 | 4  | 64476.36 | -0.071 |          |       |          |       |
| 22 | 5  | 17 | 21 | 2  | 19 | 68104.00 | -0.098 |          |       |          |       |
| 22 | 8  | 15 | 21 | 7  | 15 | 62090.32 | -0.347 | 61081.13 | -0.25 | 60135.33 | -0.23 |
| 22 | 8  | 14 | 21 | 7  | 14 | 62090.32 | 0.433  | 61081.13 | 0.38  | 60135.33 | 0.28  |
| 22 | 9  | 14 | 21 | 8  | 14 | 65815.32 | 0.018  | 64720.58 | 0.01  |          |       |
| 22 | 9  | 13 | 21 | 8  | 13 | 65815.32 | 0.042  | 64720.58 | 0.03  |          |       |
| 22 | 10 | 13 | 21 | 9  | 13 | 69521.71 | -0.026 |          |       |          |       |
| 22 | 10 | 12 | 21 | 9  | 12 | 69521.71 | -0.025 |          |       |          |       |
| 22 | 11 | 12 | 21 | 10 | 12 | 73218.66 | -0.120 | 71956.52 | -0.11 |          |       |
| 22 | 11 | 11 | 21 | 10 | 11 | 73218.66 | -0.120 | 71956.52 | -0.11 |          |       |
| 22 | 17 | 5  | 22 | 16 | 7  | 60784.21 | 0.041  |          |       |          |       |
| 22 | 17 | 6  | 22 | 16 | 6  | 60784.21 | 0.041  |          |       |          |       |
| 22 | 18 | 4  | 22 | 17 | 6  | 64473.12 | -0.002 |          |       |          |       |
| 22 | 18 | 5  | 22 | 17 | 5  | 64473.12 | -0.002 |          |       |          |       |
| 23 | 5  | 18 | 22 | 2  | 20 | 70076.50 | -0.032 |          |       |          |       |
| 23 | 7  | 17 | 22 | 6  | 17 | 59864.95 | -0.048 |          |       |          |       |
| 23 | 7  | 16 | 22 | 6  | 16 | 59835.41 | 0.048  |          |       |          |       |
| 23 | 8  | 16 | 22 | 7  | 16 | 63636.50 | -0.085 | 62610.91 | -0.08 | 61648.79 | -0.10 |
| 23 | 8  | 15 | 22 | 7  | 15 | 63635.17 | 0.073  | 62609.76 | -0.02 | 61647.96 | 0.05  |
| 23 | 9  | 15 | 22 | 8  | 15 | 67370.74 | -0.095 | 66259.03 | -0.04 |          |       |
| 23 | 9  | 14 | 22 | 8  | 14 | 67370.74 | -0.043 | 66259.03 | 0.00  |          |       |
| 23 | 10 | 14 | 22 | 9  | 14 | 71082.73 | -0.031 |          |       |          |       |
| 23 | 10 | 13 | 22 | 9  | 13 | 71082.73 | -0.030 |          |       |          |       |
| 23 | 17 | 6  | 23 | 16 | 8  | 60779.64 | -0.068 |          |       |          |       |
| 23 | 17 | 7  | 23 | 16 | 7  | 60779.64 | -0.068 |          |       |          |       |
| 23 | 18 | 5  | 23 | 17 | 7  | 64469.31 | -0.044 |          |       |          |       |
| 23 | 18 | 6  | 23 | 17 | 6  | 64469.31 | -0.044 |          |       |          |       |
| 24 | 7  | 18 | 23 | 6  | 18 | 61391.71 | -0.055 |          |       |          |       |
| 24 | 7  | 17 | 23 | 6  | 17 | 61342.61 | 0.101  |          |       |          |       |
| 24 | 8  | 17 | 23 | 7  | 17 | 65178.16 | 0.057  | 64136.53 | 0.02  |          |       |

|    |    |    |    |    |    |          |        |          |       |
|----|----|----|----|----|----|----------|--------|----------|-------|
| 24 | 8  | 16 | 23 | 7  | 16 | 65175.53 | 0.172  | 64134.36 | 0.08  |
| 24 | 9  | 16 | 23 | 8  | 16 | 68923.40 | -0.126 | 67794.82 | -0.13 |
| 24 | 9  | 15 | 23 | 8  | 15 | 68923.40 | -0.020 | 67794.82 | -0.04 |
| 24 | 10 | 15 | 23 | 9  | 15 | 72641.91 | -0.018 |          |       |
| 24 | 10 | 14 | 23 | 9  | 14 | 72641.91 | -0.015 |          |       |
| 24 | 17 | 7  | 24 | 16 | 9  | 60774.71 | 0.057  |          |       |
| 24 | 17 | 8  | 24 | 16 | 8  | 60774.71 | 0.057  |          |       |
| 24 | 18 | 6  | 24 | 17 | 8  | 64465.06 | -0.028 |          |       |
| 24 | 18 | 7  | 24 | 17 | 7  | 64465.06 | -0.028 |          |       |
| 25 | 7  | 19 | 24 | 6  | 19 | 62914.05 | 0.027  |          |       |
| 25 | 7  | 18 | 24 | 6  | 18 | 62834.27 | -0.046 |          |       |
| 25 | 8  | 18 | 24 | 7  | 18 | 66714.67 | -0.115 | 65657.49 | -0.04 |
| 25 | 8  | 17 | 24 | 7  | 17 | 66709.95 | 0.083  | 65653.59 | 0.05  |
| 25 | 9  | 17 | 24 | 8  | 17 | 70472.93 | -0.097 |          |       |
| 25 | 9  | 16 | 24 | 8  | 16 | 70472.93 | 0.112  |          |       |
| 25 | 10 | 16 | 24 | 9  | 16 | 74199.02 | 0.018  |          |       |
| 25 | 10 | 15 | 24 | 9  | 15 | 74199.02 | 0.024  |          |       |
| 25 | 17 | 8  | 25 | 16 | 10 | 60768.94 | -0.012 |          |       |
| 25 | 17 | 9  | 25 | 16 | 9  | 60768.94 | -0.012 |          |       |
| 25 | 18 | 7  | 25 | 17 | 9  | 64460.26 | -0.020 |          |       |
| 25 | 18 | 8  | 25 | 17 | 8  | 64460.26 | -0.020 |          |       |
| 26 | 6  | 21 | 25 | 5  | 21 | 60801.45 | 0.075  |          |       |
| 26 | 6  | 20 | 25 | 5  | 20 | 59701.96 | -0.030 |          |       |
| 26 | 7  | 20 | 25 | 6  | 20 | 64432.71 | 0.075  |          |       |
| 26 | 7  | 19 | 25 | 6  | 19 | 64306.95 | 0.094  |          |       |
| 26 | 8  | 19 | 25 | 7  | 19 | 68246.25 | 0.024  |          |       |
| 26 | 8  | 18 | 25 | 7  | 18 | 68237.71 | 0.058  | 67166.67 | -0.03 |
| 26 | 9  | 18 | 25 | 8  | 18 | 72018.77 | -0.196 |          |       |
| 26 | 9  | 17 | 25 | 8  | 17 | 72018.77 | 0.205  |          |       |
| 26 | 18 | 8  | 26 | 17 | 10 | 64454.91 | 0.025  |          |       |
| 26 | 18 | 9  | 26 | 17 | 9  | 64454.91 | 0.025  |          |       |
| 27 | 3  | 25 | 26 | 2  | 25 | 61160.13 | 0.014  |          |       |
| 27 | 4  | 24 | 26 | 3  | 24 | 59939.50 | -0.015 |          |       |
| 27 | 5  | 23 | 26 | 4  | 23 | 60124.28 | 0.097  |          |       |
| 27 | 6  | 22 | 26 | 5  | 22 | 62398.85 | 0.001  |          |       |
| 27 | 6  | 21 | 26 | 5  | 21 | 60908.14 | 0.033  |          |       |
| 27 | 7  | 21 | 26 | 6  | 21 | 65949.04 | 0.059  |          |       |
| 27 | 7  | 20 | 26 | 6  | 20 | 65755.25 | 0.031  |          |       |
| 27 | 8  | 20 | 26 | 7  | 20 | 69772.09 | 0.009  |          |       |
| 27 | 8  | 19 | 26 | 7  | 19 | 69757.64 | 0.129  |          |       |
| 27 | 9  | 19 | 26 | 8  | 19 | 73560.84 | -0.110 |          |       |
| 27 | 9  | 18 | 26 | 8  | 18 | 73560.27 | 0.067  |          |       |
| 27 | 18 | 9  | 27 | 17 | 11 | 64448.94 | 0.084  |          |       |
| 27 | 18 | 10 | 27 | 17 | 10 | 64448.94 | 0.084  |          |       |
| 28 | 3  | 25 | 27 | 2  | 25 | 60376.15 | 0.069  |          |       |
| 28 | 3  | 26 | 27 | 2  | 26 | 63520.09 | -0.082 |          |       |
| 28 | 4  | 25 | 27 | 3  | 25 | 62176.99 | 0.065  |          |       |
| 28 | 5  | 24 | 27 | 4  | 24 | 62051.23 | 0.072  |          |       |
| 28 | 6  | 23 | 27 | 5  | 23 | 64023.42 | -0.112 |          |       |
| 28 | 6  | 22 | 27 | 5  | 22 | 62059.01 | 0.114  |          |       |
| 28 | 7  | 22 | 27 | 6  | 22 | 67465.05 | -0.006 |          |       |
| 28 | 7  | 21 | 27 | 6  | 21 | 67173.44 | 0.016  |          |       |
| 28 | 8  | 21 | 27 | 7  | 21 | 71292.06 | -0.054 |          |       |

|    |   |    |    |   |    |          |        |
|----|---|----|----|---|----|----------|--------|
| 28 | 8 | 20 | 27 | 7 | 20 | 71267.96 | 0.021  |
| 29 | 3 | 26 | 28 | 2 | 26 | 63013.64 | -0.094 |
| 29 | 4 | 26 | 28 | 3 | 26 | 64446.80 | 0.138  |
| 29 | 5 | 25 | 28 | 4 | 25 | 64031.58 | -0.128 |
| 29 | 6 | 24 | 28 | 5 | 24 | 65681.06 | -0.060 |
| 29 | 6 | 23 | 28 | 5 | 23 | 63164.84 | -0.086 |
| 29 | 7 | 22 | 28 | 6 | 22 | 68554.42 | -0.060 |
| 29 | 8 | 22 | 28 | 7 | 22 | 72806.22 | -0.030 |
| 30 | 5 | 26 | 29 | 4 | 26 | 66065.29 | -0.008 |
| 30 | 6 | 24 | 29 | 5 | 24 | 64244.61 | -0.075 |
| 31 | 5 | 27 | 30 | 4 | 27 | 68150.23 | -0.060 |
| 31 | 6 | 26 | 30 | 5 | 26 | 69116.55 | 0.068  |
| 31 | 6 | 25 | 30 | 5 | 25 | 65323.85 | 0.087  |
| 31 | 7 | 24 | 30 | 6 | 24 | 71174.29 | -0.078 |

**Table S2.** Measured transition frequencies for PTS (MHz).

| $J''$ | $K_a''$ | $K_c''$ | $F''$ | $J'$ | $K_a'$ | $K_c'$ | $F'$ | $\nu$    | $\Delta\nu$ |
|-------|---------|---------|-------|------|--------|--------|------|----------|-------------|
| 1     | 1       | 0       | 1     | 0    | 0      | 0      | 1    | 3197.851 | -0.005      |
| 1     | 1       | 0       | 2     | 0    | 0      | 0      | 1    | 3197.473 | -0.001      |
| 1     | 1       | 0       | 0     | 0    | 0      | 0      | 1    | 3196.904 | 0.003       |
| 2     | 1       | 1       | 2     | 1    | 0      | 1      | 1    | 4324.263 | -0.005      |
| 2     | 1       | 1       | 2     | 1    | 0      | 1      | 2    | 4323.476 | -0.005      |
| 2     | 1       | 1       | 3     | 1    | 0      | 1      | 2    | 4323.913 | -0.003      |
| 2     | 1       | 1       | 1     | 1    | 0      | 1      | 0    | 4322.975 | 0.000       |
| 3     | 0       | 3       | 2     | 2    | 0      | 2      | 1    | 3224.251 | -0.018      |
| 3     | 0       | 3       | 4     | 2    | 0      | 2      | 3    | 3224.461 | 0.029       |
| 3     | 1       | 2       | 2     | 2    | 0      | 2      | 1    | 5475.620 | -0.022      |
| 3     | 1       | 2       | 3     | 2    | 0      | 2      | 2    | 5476.036 | -0.014      |
| 3     | 1       | 2       | 4     | 2    | 0      | 2      | 3    | 5475.874 | -0.003      |
| 3     | 1       | 2       | 3     | 2    | 1      | 1      | 2    | 3302.894 | -0.002      |
| 3     | 1       | 2       | 4     | 2    | 1      | 1      | 3    | 3303.129 | -0.002      |
| 3     | 1       | 2       | 2     | 2    | 0      | 2      | 2    | 5476.955 | -0.001      |
| 3     | 1       | 3       | 4     | 2    | 1      | 2      | 3    | 3151.943 | 0.003       |
| 3     | 1       | 3       | 3     | 2    | 1      | 2      | 2    | 3151.710 | 0.004       |
| 3     | 2       | 1       | 3     | 2    | 2      | 0      | 2    | 3231.009 | 0.001       |
| 3     | 2       | 1       | 4     | 2    | 2      | 0      | 3    | 3231.856 | 0.002       |
| 3     | 2       | 2       | 4     | 2    | 2      | 1      | 3    | 3228.224 | 0.004       |
| 3     | 2       | 2       | 3     | 2    | 2      | 1      | 2    | 3227.380 | 0.005       |
| 4     | 0       | 4       | 5     | 3    | 0      | 3      | 4    | 4294.973 | -0.020      |
| 4     | 1       | 3       | 4     | 3    | 0      | 3      | 3    | 6654.560 | -0.016      |
| 4     | 1       | 3       | 3     | 3    | 0      | 3      | 2    | 6654.358 | -0.010      |
| 4     | 1       | 3       | 3     | 3    | 0      | 3      | 3    | 6655.546 | -0.004      |
| 4     | 1       | 4       | 4     | 3    | 1      | 3      | 3    | 4201.392 | 0.000       |
| 4     | 1       | 3       | 4     | 3    | 1      | 2      | 3    | 4402.928 | 0.002       |
| 4     | 1       | 3       | 4     | 3    | 0      | 3      | 4    | 6653.703 | 0.002       |
| 4     | 1       | 3       | 5     | 3    | 0      | 3      | 4    | 6654.483 | 0.007       |
| 4     | 1       | 3       | 5     | 3    | 1      | 2      | 4    | 4403.056 | 0.025       |
| 4     | 1       | 4       | 5     | 3    | 1      | 3      | 4    | 4201.521 | 0.026       |
| 4     | 2       | 3       | 5     | 3    | 2      | 2      | 4    | 4303.428 | -0.002      |
| 4     | 2       | 2       | 5     | 3    | 2      | 1      | 4    | 4312.499 | 0.000       |
| 4     | 2       | 3       | 4     | 3    | 2      | 2      | 3    | 4303.073 | 0.001       |
| 4     | 2       | 2       | 4     | 3    | 2      | 1      | 3    | 4312.142 | 0.002       |

|    |    |    |   |    |    |    |   |          |        |
|----|----|----|---|----|----|----|---|----------|--------|
| 4  | 2  | 3  | 3 | 3  | 2  | 2  | 2 | 4303.526 | 0.004  |
| 4  | 2  | 2  | 3 | 3  | 2  | 1  | 2 | 4312.597 | 0.005  |
| 5  | 0  | 5  | 6 | 4  | 0  | 4  | 5 | 5361.991 | 0.012  |
| 5  | 1  | 5  | 6 | 4  | 1  | 4  | 5 | 5250.192 | -0.019 |
| 5  | 1  | 4  | 6 | 4  | 1  | 3  | 5 | 5501.978 | -0.005 |
| 5  | 1  | 4  | 4 | 4  | 0  | 4  | 3 | 7861.400 | -0.005 |
| 5  | 1  | 4  | 5 | 4  | 0  | 4  | 4 | 7861.547 | 0.019  |
| 5  | 2  | 4  | 5 | 4  | 2  | 3  | 4 | 5377.898 | 0.000  |
| 5  | 2  | 3  | 5 | 4  | 2  | 2  | 4 | 5395.980 | 0.000  |
| 5  | 2  | 4  | 6 | 4  | 2  | 3  | 5 | 5378.090 | 0.005  |
| 5  | 2  | 3  | 6 | 4  | 2  | 2  | 5 | 5396.179 | 0.010  |
| 6  | 0  | 6  | 7 | 5  | 0  | 5  | 6 | 6424.588 | 0.002  |
| 6  | 1  | 5  | 7 | 5  | 1  | 4  | 6 | 6599.690 | -0.008 |
| 6  | 2  | 4  | 6 | 5  | 2  | 3  | 5 | 6483.352 | -0.011 |
| 6  | 2  | 5  | 6 | 5  | 2  | 4  | 5 | 6451.881 | -0.009 |
| 6  | 2  | 5  | 7 | 5  | 2  | 4  | 6 | 6452.011 | 0.010  |
| 6  | 2  | 4  | 7 | 5  | 2  | 3  | 6 | 6483.490 | 0.014  |
| 7  | 0  | 7  | 8 | 6  | 0  | 6  | 7 | 7482.124 | -0.006 |
| 7  | 1  | 7  | 8 | 6  | 1  | 6  | 7 | 7344.377 | -0.025 |
| 7  | 1  | 6  | 8 | 6  | 1  | 5  | 7 | 7695.875 | 0.011  |
| 12 | 12 | 1  |   | 11 | 11 | 1  |   | 61126.66 | -0.076 |
| 12 | 12 | 0  |   | 11 | 11 | 0  |   | 61126.66 | -0.076 |
| 13 | 12 | 2  |   | 12 | 11 | 2  |   | 62203.08 | 0.108  |
| 13 | 12 | 1  |   | 12 | 11 | 1  |   | 62203.08 | 0.108  |
| 13 | 13 | 1  |   | 12 | 12 | 1  |   | 66395.24 | 0.131  |
| 13 | 13 | 0  |   | 12 | 12 | 0  |   | 66395.24 | 0.131  |
| 14 | 12 | 3  |   | 13 | 11 | 3  |   | 63279.18 | -0.008 |
| 14 | 12 | 2  |   | 13 | 11 | 2  |   | 63279.18 | -0.008 |
| 14 | 13 | 2  |   | 13 | 12 | 2  |   | 67471.37 | 0.037  |
| 14 | 13 | 1  |   | 13 | 12 | 1  |   | 67471.37 | 0.037  |
| 14 | 14 | 1  |   | 13 | 13 | 1  |   | 71663.43 | -0.002 |
| 14 | 14 | 0  |   | 13 | 13 | 0  |   | 71663.43 | -0.002 |
| 15 | 11 | 5  |   | 14 | 10 | 5  |   | 60163.06 | -0.055 |
| 15 | 11 | 4  |   | 14 | 10 | 4  |   | 60163.06 | -0.055 |
| 15 | 12 | 4  |   | 14 | 11 | 4  |   | 64355.34 | -0.032 |
| 15 | 12 | 3  |   | 14 | 11 | 3  |   | 64355.34 | -0.032 |
| 15 | 13 | 3  |   | 14 | 12 | 3  |   | 68547.60 | 0.061  |
| 15 | 13 | 2  |   | 14 | 12 | 2  |   | 68547.60 | 0.061  |
| 15 | 14 | 2  |   | 14 | 13 | 2  |   | 72739.55 | -0.094 |
| 15 | 14 | 1  |   | 14 | 13 | 1  |   | 72739.55 | -0.094 |
| 16 | 11 | 6  |   | 15 | 10 | 6  |   | 61239.15 | -0.041 |
| 16 | 11 | 5  |   | 15 | 10 | 5  |   | 61239.15 | -0.041 |
| 16 | 13 | 4  |   | 15 | 12 | 4  |   | 69623.65 | -0.066 |
| 16 | 13 | 3  |   | 15 | 12 | 3  |   | 69623.65 | -0.066 |
| 16 | 14 | 3  |   | 15 | 13 | 3  |   | 73815.78 | -0.057 |
| 16 | 14 | 2  |   | 15 | 13 | 2  |   | 73815.78 | -0.057 |
| 17 | 11 | 7  |   | 16 | 10 | 7  |   | 62315.24 | 0.055  |
| 17 | 11 | 6  |   | 16 | 10 | 6  |   | 62315.24 | 0.055  |
| 18 | 11 | 8  |   | 17 | 10 | 8  |   | 63391.12 | 0.042  |
| 18 | 11 | 7  |   | 17 | 10 | 7  |   | 63391.12 | 0.042  |
| 19 | 10 | 10 |   | 18 | 9  | 10 |   | 60273.80 | 0.146  |
| 19 | 10 | 9  |   | 18 | 9  | 9  |   | 60273.80 | 0.146  |
| 20 | 10 | 11 |   | 19 | 9  | 11 |   | 61348.94 | 0.000  |

|    |    |    |    |   |    |          |        |
|----|----|----|----|---|----|----------|--------|
| 20 | 10 | 10 | 19 | 9 | 10 | 61348.94 | 0.000  |
| 21 | 10 | 12 | 20 | 9 | 12 | 62423.91 | -0.074 |
| 21 | 10 | 11 | 20 | 9 | 11 | 62423.91 | -0.074 |
| 22 | 10 | 13 | 21 | 9 | 13 | 63498.78 | 0.031  |
| 22 | 10 | 12 | 21 | 9 | 12 | 63498.78 | 0.031  |
| 23 | 9  | 15 | 22 | 8 | 15 | 60375.99 | 0.070  |
| 23 | 9  | 14 | 22 | 8 | 14 | 60375.99 | 0.070  |
| 23 | 10 | 14 | 22 | 9 | 14 | 64573.22 | 0.019  |
| 23 | 10 | 13 | 22 | 9 | 13 | 64573.22 | 0.019  |
| 24 | 9  | 16 | 23 | 8 | 16 | 61448.84 | 0.018  |
| 24 | 9  | 15 | 23 | 8 | 15 | 61448.84 | 0.018  |
| 24 | 10 | 15 | 23 | 9 | 15 | 65647.33 | 0.033  |
| 24 | 10 | 14 | 23 | 9 | 14 | 65647.33 | 0.033  |
| 25 | 9  | 17 | 24 | 8 | 17 | 62521.20 | 0.067  |
| 25 | 9  | 16 | 24 | 8 | 16 | 62521.20 | 0.067  |
| 25 | 10 | 16 | 24 | 9 | 16 | 66720.98 | -0.018 |
| 25 | 10 | 15 | 24 | 9 | 15 | 66720.98 | -0.018 |
| 26 | 9  | 18 | 25 | 8 | 18 | 63592.72 | -0.068 |
| 26 | 9  | 17 | 25 | 8 | 17 | 63592.72 | -0.068 |
| 26 | 10 | 17 | 25 | 9 | 17 | 67794.22 | -0.037 |
| 26 | 10 | 16 | 25 | 9 | 16 | 67794.22 | -0.037 |
| 27 | 8  | 20 | 26 | 7 | 20 | 60451.70 | -0.006 |
| 27 | 8  | 19 | 26 | 7 | 19 | 60451.70 | 0.031  |
| 27 | 9  | 19 | 26 | 8 | 19 | 64663.69 | -0.031 |
| 27 | 9  | 18 | 26 | 8 | 18 | 64663.69 | -0.030 |
| 28 | 8  | 21 | 27 | 7 | 21 | 61518.16 | -0.044 |
| 28 | 8  | 20 | 27 | 7 | 20 | 61518.16 | 0.019  |
| 28 | 9  | 20 | 27 | 8 | 20 | 65733.78 | -0.079 |
| 28 | 9  | 19 | 27 | 8 | 19 | 65733.78 | -0.078 |
| 29 | 8  | 22 | 28 | 7 | 22 | 62583.24 | -0.114 |
| 29 | 8  | 21 | 28 | 7 | 21 | 62583.24 | -0.009 |
| 31 | 7  | 25 | 30 | 6 | 25 | 60448.75 | -0.047 |
| 31 | 7  | 24 | 30 | 6 | 24 | 60441.83 | 0.137  |

**Table S3.** Measured transition frequencies for OTS(MHz).

| $J''$ | $K_a''$ | $K_c''$ | $F''$ | $J'$ | $K_a'$ | $K_c'$ | $F'$ | $\nu$    | $\Delta\nu$ |
|-------|---------|---------|-------|------|--------|--------|------|----------|-------------|
| 1     | 1       | 0       | 0     | 0    | 0      | 0      | 1    | 2581.311 | -0.006      |
| 1     | 1       | 0       | 2     | 0    | 0      | 0      | 1    | 2582.010 | -0.021      |
| 1     | 1       | 0       | 1     | 0    | 0      | 0      | 1    | 2582.501 | -0.007      |
| 2     | 0       | 2       | 2     | 1    | 0      | 1      | 2    | 2901.407 | 0.004       |
| 2     | 0       | 2       | 1     | 1    | 0      | 1      | 0    | 2901.548 | 0.004       |
| 2     | 0       | 2       | 3     | 1    | 0      | 1      | 2    | 2902.072 | -0.009      |
| 2     | 0       | 2       | 1     | 1    | 0      | 1      | 1    | 2903.056 | -0.011      |
| 2     | 1       | 2       | 2     | 1    | 1      | 1      | 1    | 2737.889 | 0.005       |
| 2     | 1       | 2       | 3     | 1    | 1      | 1      | 2    | 2738.521 | -0.006      |
| 2     | 1       | 2       | 1     | 1    | 1      | 1      | 1    | 2738.678 | 0.000       |
| 2     | 1       | 2       | 1     | 1    | 1      | 1      | 0    | 2738.988 | -0.022      |
| 2     | 1       | 1       | 2     | 1    | 1      | 0      | 1    | 3117.719 | 0.008       |
| 2     | 1       | 1       | 1     | 1    | 1      | 0      | 1    | 3117.948 | 0.016       |
| 2     | 1       | 1       | 3     | 1    | 1      | 0      | 2    | 3118.337 | 0.007       |
| 2     | 1       | 1       | 1     | 1    | 1      | 0      | 0    | 3119.122 | -0.001      |
| 2     | 1       | 1       | 3     | 1    | 0      | 1      | 2    | 4236.109 | 0.002       |



| 2     | 1       | 1       | 2    | 1      | 0      | 1             | 1                 | 4236.585      | 0.012             |
|-------|---------|---------|------|--------|--------|---------------|-------------------|---------------|-------------------|
| 2     | 1       | 1       | 1    | 1      | 0      | 1             | 1                 | 4236.799      | 0.004             |
| 3     | 0       | 3       | 3    | 2      | 0      | 2             | 3                 | 4289.797      | -0.032            |
| 3     | 0       | 3       | 4    | 2      | 0      | 2             | 3                 | 4290.539      | -0.030            |
| 3     | 0       | 3       | 3    | 2      | 0      | 2             | 2                 | 4290.539      | 0.032             |
| 3     | 0       | 3       | 2    | 2      | 0      | 2             | 2                 | 4291.509      | 0.002             |
| 3     | 1       | 3       | 3    | 2      | 1      | 2             | 3                 | 4091.516      | -0.003            |
| 3     | 1       | 3       | 3    | 2      | 1      | 2             | 2                 | 4092.018      | -0.010            |
| 3     | 1       | 3       | 4    | 2      | 1      | 2             | 3                 | 4092.229      | 0.005             |
| 3     | 1       | 3       | 2    | 2      | 1      | 2             | 2                 | 4092.968      | -0.014            |
| 3     | 1       | 2       | 3    | 2      | 1      | 1             | 2                 | 4659.478      | 0.006             |
| 3     | 1       | 2       | 4    | 2      | 1      | 1             | 3                 | 4659.650      | -0.006            |
| 3     | 1       | 2       | 2    | 2      | 0      | 2             | 1                 | 5993.420      | 0.002             |
| 3     | 1       | 2       | 4    | 2      | 0      | 2             | 3                 | 5993.672      | -0.009            |
| 3     | 1       | 2       | 3    | 2      | 0      | 2             | 2                 | 5994.050      | 0.016             |
| 3     | 2       | 2       | 3    | 2      | 2      | 1             | 2                 | 4391.961      | 0.013             |
| 3     | 2       | 2       | 4    | 2      | 2      | 1             | 3                 | 4392.617      | 0.016             |
| 3     | 2       | 2       | 2    | 2      | 2      | 1             | 1                 | 4392.979      | 0.016             |
| 3     | 2       | 1       | 3    | 2      | 2      | 0             | 2                 | 4493.882      | -0.015            |
| 3     | 2       | 1       | 4    | 2      | 2      | 0             | 3                 | 4494.521      | 0.010             |
| 3     | 2       | 1       | 2    | 2      | 2      | 0             | 1                 | 4494.881      | 0.015             |
| 4     | 0       | 4       | 4    | 3      | 0      | 3             | 4                 | 5618.674      | 0.005             |
| 4     | 0       | 4       | 5    | 3      | 0      | 3             | 4                 | 5619.422      | -0.047            |
| 4     | 0       | 4       | 4    | 3      | 0      | 3             | 3                 | 5619.422      | 0.013             |
| 4     | 0       | 4       | 3    | 3      | 0      | 3             | 2                 | 5619.422      | 0.007             |
| 4     | 0       | 4       | 3    | 3      | 0      | 3             | 3                 | 5620.415      | 0.000             |
| 4     | 1       | 4       | 5    | 3      | 1      | 3             | 4                 | 5430.464      | 0.004             |
| 4     | 1       | 3       | 5    | 3      | 1      | 2             | 4                 | 6176.491      | -0.009            |
| 4     | 1       | 3       | 3    | 3      | 1      | 2             | 2                 | 6176.491      | -0.003            |
| 4     | 1       | 3       | 3    | 3      | 0      | 3             | 2                 | 7879.437      | -0.023            |
| 4     | 1       | 3       | 5    | 3      | 0      | 3             | 4                 | 7879.601      | -0.010            |
| 4     | 1       | 3       | 4    | 3      | 0      | 3             | 3                 | 7879.919      | -0.014            |
| 4     | 2       | 3       | 4    | 3      | 2      | 2             | 3                 | 5835.871      | 0.006             |
| 4     | 2       | 3       | 5    | 3      | 2      | 2             | 4                 | 5836.171      | 0.023             |
| 4     | 2       | 2       | 4    | 3      | 2      | 1             | 3                 | 6072.919      | 0.024             |
| 4     | 2       | 2       | 5    | 3      | 2      | 1             | 4                 | 6073.178      | 0.044             |
| 4     | 2       | 2       | 3    | 3      | 2      | 1             | 2                 | 6073.178      | -0.024            |
| 5     | 0       | 5       | 6    | 4      | 0      | 4             | 5                 | 6900.569      | 0.004             |
| 5     | 1       | 5       | 6    | 4      | 1      | 4             | 5                 | 6752.373      | 0.002             |
| 5     | 1       | 4       | 6    | 4      | 1      | 3             | 5                 | 7655.594      | -0.007            |
| 5     | 2       | 4       | 5    | 4      | 2      | 3             | 4                 | 7262.346      | -0.007            |
| 5     | 2       | 4       | 6    | 4      | 2      | 3             | 5                 | 7262.505      | -0.004            |
| $J''$ | $K_a''$ | $K_c''$ | $J'$ | $K_a'$ | $K_c'$ | $\nu_A$ (MHz) | $\Delta\nu$ (MHz) | $\nu_E$ (MHz) | $\Delta\nu$ (MHz) |
| 18    | 17      | 2       | 17   | 16     | 2      | 60125.17      | 0.021             | 60124.550     | -0.003            |
| 18    | 17      | 1       | 17   | 16     | 1      | 60125.17      | 0.021             |               |                   |
| 18    | 18      | 1       | 17   | 17     | 1      | 62162.32      | 0.070             | 62161.67      | 0.020             |
| 18    | 18      | 0       | 17   | 17     | 0      | 62162.32      | 0.070             |               |                   |
| 19    | 17      | 3       | 18   | 16     | 3      | 61597.68      | -0.032            | 61597.14      | 0.027             |
| 19    | 17      | 2       | 18   | 16     | 2      | 61597.68      | -0.032            |               |                   |
| 19    | 18      | 2       | 18   | 17     | 2      | 63635.03      | 0.049             | 63634.39      | 0.012             |
| 19    | 18      | 1       | 18   | 17     | 1      | 63635.03      | 0.049             |               |                   |
| 19    | 19      | 1       | 18   | 18     | 1      | 65672.05      | -0.006            | 65671.52      | 0.071             |

|    |    |    |    |    |    |          |        |           |        |
|----|----|----|----|----|----|----------|--------|-----------|--------|
| 19 | 19 | 0  | 18 | 18 | 0  | 65672.05 | -0.006 |           |        |
| 20 | 16 | 5  | 19 | 15 | 5  | 61031.70 | -0.025 | 61031.11  | -0.016 |
| 20 | 16 | 4  | 19 | 15 | 4  | 61031.70 | -0.025 |           |        |
| 20 | 17 | 4  | 19 | 16 | 4  | 63070.00 | 0.029  | 63069.39  | 0.022  |
| 20 | 17 | 3  | 19 | 16 | 3  | 63070.00 | 0.029  |           |        |
| 20 | 18 | 3  | 19 | 17 | 3  | 65107.47 | -0.082 | 65106.90  | -0.045 |
| 20 | 18 | 2  | 19 | 17 | 2  | 65107.47 | -0.082 |           |        |
| 20 | 19 | 1  | 19 | 18 | 1  |          |        | 67145.070 | -0.007 |
| 20 | 20 | 1  | 19 | 19 | 1  | 69181.72 | -0.103 | 69181.180 | -0.029 |
| 20 | 20 | 0  | 19 | 19 | 0  | 69181.72 | -0.103 | 69182.140 | 0.017  |
| 21 | 15 | 7  | 20 | 14 | 7  | 60462.06 | 0.003  | 60461.41  | -0.048 |
| 21 | 15 | 6  | 20 | 14 | 6  | 60462.06 | 0.003  | 60462.32  | -0.052 |
| 21 | 16 | 6  | 20 | 15 | 6  |          |        | 62502.11  | -0.032 |
| 21 | 16 | 5  | 20 | 15 | 5  |          |        | 62502.99  | -0.065 |
| 21 | 17 | 5  | 20 | 16 | 5  | 64541.81 | 0.022  | 64541.28  | 0.097  |
| 21 | 17 | 4  | 20 | 16 | 4  | 64541.81 | 0.022  |           |        |
| 21 | 18 | 4  | 20 | 17 | 4  | 66579.78 | -0.072 | 66579.31  | 0.067  |
| 21 | 18 | 3  | 20 | 17 | 3  | 66579.78 | -0.072 |           |        |
| 21 | 19 | 2  | 20 | 18 | 2  | 68617.38 | 0.035  | 67144.30  | 0.137  |
| 21 | 19 | 3  | 20 | 18 | 3  | 68617.38 | 0.035  |           |        |
| 22 | 15 | 8  | 21 | 14 | 8  | 61930.60 | 0.063  | 61929.99  | 0.055  |
| 22 | 15 | 7  | 21 | 14 | 7  | 61930.60 | 0.063  |           |        |
| 22 | 16 | 7  | 21 | 15 | 7  | 63972.82 | -0.074 | 63972.36  | 0.072  |
| 22 | 16 | 6  | 21 | 15 | 6  | 63972.82 | -0.074 |           |        |
| 22 | 16 | 7  | 21 | 15 | 7  |          |        |           |        |
| 22 | 17 | 6  | 21 | 16 | 6  | 66012.96 | -0.055 | 66012.33  | -0.076 |
| 22 | 17 | 5  | 21 | 16 | 5  | 66012.96 | -0.055 |           |        |
| 22 | 20 | 3  | 21 | 19 | 3  | 72127.11 | 0.018  | 72126.46  | -0.012 |
| 22 | 20 | 2  | 21 | 19 | 2  | 72127.11 | 0.018  |           |        |
| 23 | 14 | 10 | 22 | 13 | 10 | 61348.33 | 0.072  | 61347.72  | 0.065  |
| 23 | 14 | 9  | 22 | 13 | 9  | 61348.33 | 0.072  |           |        |
| 23 | 15 | 9  | 22 | 14 | 9  |          |        | 63396.93  | 0.048  |
| 23 | 15 | 8  | 22 | 14 | 8  |          |        | 63397.77  | -0.025 |
| 23 | 16 | 8  | 22 | 15 | 8  | 65441.95 | -0.015 | 65441.38  | 0.024  |
| 23 | 16 | 7  | 22 | 15 | 7  | 65441.95 | -0.015 | 65442.24  | -0.028 |
| 24 | 13 | 12 | 23 | 12 | 12 | 60746.25 | -0.035 | 60745.66  | -0.016 |
| 24 | 13 | 11 | 23 | 12 | 11 | 60746.25 | -0.029 | 60746.56  | -0.039 |
| 24 | 14 | 11 | 23 | 13 | 11 |          |        | 62808.79  | -0.009 |
| 24 | 14 | 10 | 23 | 13 | 10 |          |        | 62809.61  | -0.106 |
| 25 | 12 | 14 | 24 | 11 | 14 | 60105.65 | 0.026  | 60104.79  | -0.031 |
| 25 | 13 | 13 | 24 | 12 | 13 | 62197.15 | 0.119  | 62196.46  | 0.049  |
| 25 | 13 | 12 | 24 | 12 | 12 | 62197.15 | 0.138  |           |        |
| 25 | 14 | 12 | 24 | 13 | 12 |          |        | 64267.00  | 0.064  |
| 25 | 14 | 11 | 24 | 13 | 11 |          |        | 64267.84  | -0.013 |
| 26 | 12 | 15 | 25 | 11 | 15 |          |        | 61536.35  | -0.047 |
| 26 | 12 | 14 | 25 | 11 | 14 |          |        | 61537.20  | -0.078 |
| 26 | 13 | 14 | 25 | 12 | 14 | 63642.76 | -0.037 | 63642.12  | -0.037 |
| 26 | 13 | 13 | 25 | 12 | 13 | 63642.76 | 0.015  |           |        |
| 27 | 11 | 17 | 26 | 10 | 16 | 60755.46 | -0.060 | 60752.31  | 0.074  |
| 27 | 11 | 16 | 26 | 10 | 16 | 60761.70 | 0.054  | 60763.71  | 0.077  |
| 27 | 11 | 17 | 26 | 10 | 17 | 60790.96 | 0.027  | 60788.71  | 0.033  |
| 27 | 11 | 16 | 26 | 10 | 17 | 60797.03 | -0.029 | 60800.18  | 0.106  |
| 27 | 12 | 15 | 26 | 11 | 15 | 62960.02 | 0.008  |           |        |

|    |    |    |    |    |    |          |        |          |        |
|----|----|----|----|----|----|----------|--------|----------|--------|
| 27 | 12 | 16 | 26 | 11 | 16 | 62960.91 | -0.097 | 62959.41 | -0.008 |
| 28 | 11 | 18 | 27 | 10 | 17 | 62109.03 | -0.063 | 62107.19 | -0.010 |
| 28 | 11 | 17 | 27 | 10 | 17 | 62122.42 | -0.074 | 62123.62 | -0.014 |
| 28 | 11 | 18 | 27 | 10 | 18 | 62181.63 | 0.010  | 62180.21 | -0.002 |
| 29 | 11 | 18 | 28 | 10 | 18 | 63449.59 | 0.030  | 63450.11 | 0.031  |
| 29 | 11 | 19 | 28 | 10 | 19 | 63564.05 | -0.025 | 63563.24 | -0.052 |

**Table S4.** Measured transition frequencies for SUA (MHz).

| $J''$ | $K_a''$ | $K_c''$ | $I''$ | $F''$ | $J'$ | $K_a'$ | $K_c'$ | $I'$ | $F'$ | $\nu$    | $\Delta\nu$ |
|-------|---------|---------|-------|-------|------|--------|--------|------|------|----------|-------------|
| 3     | 0       | 3       |       |       | 2    | 0      | 2      |      |      | 3231.655 | -0.010      |
| 4     | 1       | 4       | 2     | 6     | 3    | 1      | 3      | 2    | 5    | 4209.013 | -0.018      |
| 4     | 1       | 4       | 2     | 5     | 3    | 1      | 3      | 2    | 4    | 4209.137 | -0.015      |
| 4     | 1       | 3       | 2     | 6     | 3    | 1      | 2      | 2    | 5    | 4415.203 | 0.067       |
| 4     | 1       | 3       | 2     | 5     | 3    | 1      | 2      | 2    | 4    | 4415.203 | -0.054      |
| 4     | 2       | 3       | 2     | 6     | 3    | 2      | 2      | 2    | 5    | 4313.251 | -0.003      |
| 5     | 0       | 5       |       |       | 4    | 0      | 4      |      |      | 5373.400 | 0.038       |
| 5     | 1       | 5       |       |       | 4    | 1      | 4      |      |      | 5259.538 | -0.019      |
| 5     | 1       | 4       |       |       | 4    | 1      | 3      |      |      | 5517.064 | 0.027       |
| 5     | 2       | 4       | 2     | 6     | 4    | 2      | 3      | 2    | 5    | 5390.564 | -0.007      |
| 5     | 2       | 4       | 2     | 7     | 4    | 2      | 3      | 2    | 6    | 5390.35  | -0.015      |
| 5     | 2       | 4       | 1     | 6     | 4    | 2      | 3      | 1    | 5    | 5390.176 | -0.002      |
| 5     | 2       | 3       | 2     | 7     | 4    | 2      | 2      | 2    | 6    | 5409.51  | -0.001      |
| 6     | 0       | 6       |       | 8     | 5    | 0      | 5      | 2    | 7    | 6437.683 | 0.001       |
| 6     | 1       | 6       |       | 8     | 5    | 1      | 5      | 2    | 7    | 6309.023 | 0.041       |
| 6     | 1       | 5       |       | 8     | 5    | 1      | 4      | 2    | 7    | 6617.587 | -0.026      |
| 6     | 2       | 5       | 1     | 7     | 5    | 2      | 4      | 1    | 6    | 6466.541 | -0.015      |
| 6     | 2       | 5       | 2     | 8     | 5    | 2      | 4      | 2    | 7    | 6466.668 | 0.001       |
| 6     | 2       | 5       | 2     | 7     | 5    | 2      | 4      | 2    | 6    | 6466.805 | 0.014       |
| 6     | 2       | 4       | 2     | 8     | 5    | 2      | 3      | 2    | 7    | 6499.996 | 0.014       |
| 7     | 0       | 7       |       |       | 6    | 0      | 6      |      |      | 7496.667 | 0.005       |
| 7     | 1       | 7       |       |       | 6    | 1      | 6      |      |      | 7357.132 | -0.017      |
| 7     | 1       | 6       |       |       | 6    | 1      | 5      |      |      | 7716.524 | -0.015      |
| 7     | 2       | 6       |       |       | 6    | 2      | 5      |      |      | 7542.016 | 0.009       |
| 7     | 2       | 5       |       |       | 6    | 2      | 4      |      |      | 7594.828 | 0.009       |
| 7     | 3       | 5       | 2     | 9     | 6    | 3      | 4      | 2    | 8    | 7556.798 | 0.009       |
| 7     | 3       | 4       | 2     | 9     | 6    | 3      | 3      | 2    | 8    | 7558.195 | -0.005      |
| 7     | 3       | 4       | 1     | 8     | 6    | 3      | 3      | 1    | 7    | 7558.044 | -0.005      |
| 7     | 3       | 4       | 2     | 8     | 6    | 3      | 3      | 2    | 7    | 7558.355 | -0.011      |

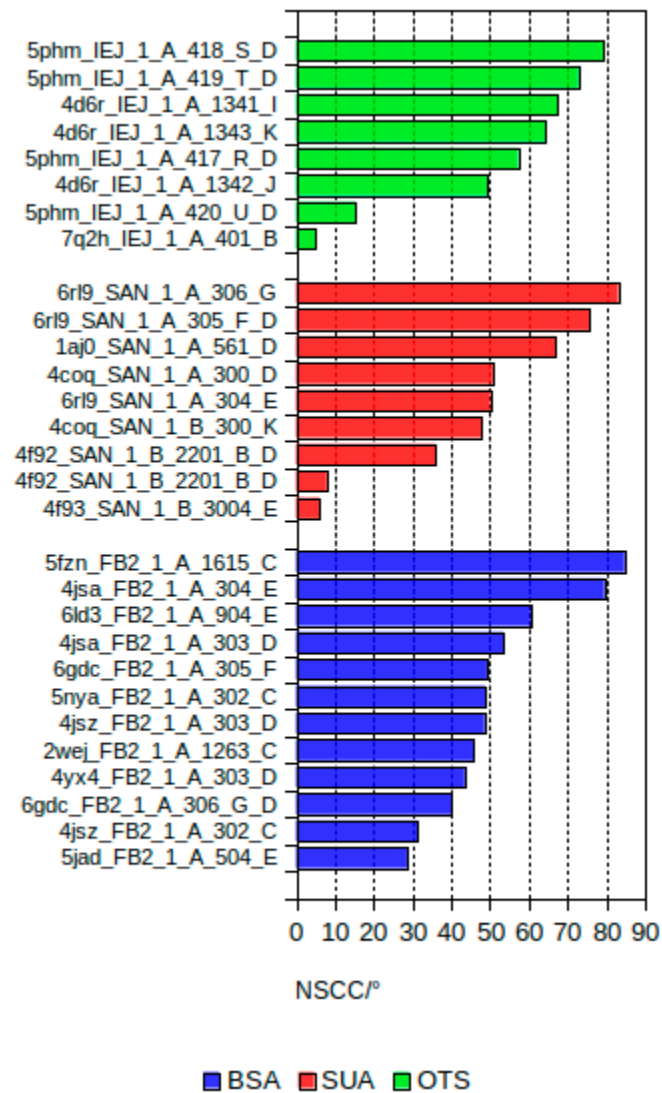

**Figure S1.**  $\angle$ CCSN torsion angle values found in PDB for BSA, SUA and OTS.
